# Supplementary material
Source: publisher site journal article supplement (https://www.dovepress.com/article/577970)
Supplement: Supplementary file 1 [file 577970%20Revised%20Supplemental%20Tables%201-6.docx]

Supplemental Table 1: Item, data source and code for Patient characteristics

| Item | Data source | Code (ICD-10 or ATC) |
| --- | --- | --- |
| Patient demographics |  |  |
| Age (years) | DPC FF1 | － |
| Male sex | DPC FF1 | － |
| Admission route |  |  |
| ED | NSER | － |
| General outpatient clinic (Cardiology) | NSER | － |
| General outpatient clinic (others) | NSER | － |
| Device type |  |  |
| Transvenous single chamber ICD | Medical record | － |
| Subcutaneous ICD | Medical record | － |
| Transvenous dual chamber ICD | Medical record | － |
| CRT-D | Medical record | － |
| Shock type |  |  |
| Appropriate shock(s) only | Medical record | － |
| Inappropriate shock(s) only | Medical record | － |
| Shock events |  |  |
| The number of shocks per admission | Medical record | － |
| Presence of Comorbidity/Past medical history |  |  |
| Acute myocardial infarction or ischemic heart disease | Medical record | － |
| Dementia or cognitive disorder | Medical record | － |
| Chronic kidney disease | Medical record | － |
| Atrial arrhythmia | Medical record | － |
| Ventricular arrhythmia | Medical record | － |
| Cardiac arrest | Medical record | － |
| Other or unspecified arrhythmias | Medical record | － |
| Heart failure | Medical record | － |
| Valvular heart disease | Medical record | － |
| Stroke/transient ischemic attack | Medical record | － |
| Congenital heart disease | Medical record | － |
| Hypertension | Medical record | － |
| Missing | Medical record | － |
| Concurrent medication(s) |  |  |
| Antithrombotic drugs | Medical record | － |
| Antiplatelet drugs | Medical record | － |
| Beta-blockers | Medical record | － |
| Statins | Medical record | － |
| Calcium channel blockers | Medica record | － |
| Nitrates | Medical record | － |
| Antidiabetic drugs | Medical record | － |
| Diuretics | Medical record | － |

**Abbreviations**: ATC, Anatomical Therapeutic Chemical; CRT-D, Cardiac Resynchronization Therapy Defibrillator; DPC, Diagnosis Procedure Combination; ED, Emergency Department; ICD, implantable cardioverter defibrillator; ICD-10, International Classification of Diseases, 10th Revision; NSER, NEXT Stage ER.

### Supplemental Table 2: Item, data source and code for Destination and related procedures

| Item | Data source | Code (ICD-10 or ATC) |
| --- | --- | --- |
| Destination |  |  |
| Outpatient | DPC FF1 | － |
| Inpatient | DPC FF1 | － |
| General ward | DPC | － |
| ICU | DPC EF | 190174410, 190174510, 190246510, 190246610, 190174610, 190174710, 190174810, 190174910, 190246710, 190246810, 190116310, 190116410, 190246910, 190247010, 190139810, 190139910, 190140010, 190140110, 190247110, 190247210, 190140270, 190140370, 190207870, 190219270, 190247310, 190247470, 190247570, 190247670, 193001610, 193001710, 193005910, 193006010, 193006110, 193006210, 193006310, 193006410, 193006570, 193006670, 193010010, 193010110, 193010210, 193010310, 193010410, 193010510, 193010610, 193010710, 193012370, 193012470, 193014110, 193014210, 193014310, 193014410, 193014510, 193014610, 193014710, 193014810, 193014970, 193015070, 193015170, 193015270, 193501610, 193501710, 193507510, 193507610, 193507710, 193507810, 193507910, 193508010, 193508170, 193508270, 193511710, 193511810, 193511910, 193512010, 193512110, 193512210, 193512310, 193512410, 193521770, 193521870, 193588110, 193588210, 193588310, 193588410, 193588510, 193588610, 193588710, 193588810, 193588970, 193589070, 193589170, 193589270, 193301410, 193301510, 193307210, 193307310, 193307410, 193307510, 193307610, 193307710, 193307870, 193307970, 193310210, 193310310, 193310410, 193310510, 193310610, 193310710, 193310810, 193310910, 193315470, 193315570, 193317210, 193317310, 193317410, 193317510, 193317610, 193317710, 193317810, 193317910, 193318070, 193318170, 193318270, 193318370 |
| Others | DPC | － |
| Refer to the other hospital | DPC | － |
| Any procedure |  |  |
| ECG | DPC EF | 160065650, 160068750, 160150650, 160198510, 160069510, 160069610, 160069750, 160186310, 160125550, 160125950, 150346910, 150347010 |
| Chest x-ray | Medical record | － |
| Cardiac catheterization | DPC EF | 160064970, 160065070, 160065370, 170002310, 170020710 |
| Echocardiography | DPC EF | 160072510, 160160410, 160186610, 160198810, 160213170, |
| Emergency room visit | NSER | － |
| Electrophysiology study and ablation | DPC EF | 150443750, 150346710, 150262810, 150346870, 150370050, 150303310 |
| Stress test | DPC EF | 160069910, 160212970, 160198810, |
| Lead or device revision | DPC EF | 150415610, 150415710, 150416010, 150416110 |
| Percutaneous coronary intervention | DPC EF | 150374910, 150375010, 150375110, 150284310, 150359310, 150443750 |
| Circulatory support | DPC EF | 150428510, 150428410, 150432610, 150432710, 150432810, 150432970, 710010014, 710010015, 710010661, 710010662, 710010663, 738960000, 737100000, 737110000, 737120000, 710010952, 721010000, 729690000, 737150000, 737160000, 150148010, 150148110, 150395450, 150395550 |
| Heart/pericardium operations including surgery | DPC EF | 150138510, 150138710, 150140610, 150448310, 150448510, 150317810, 150317910, 150448410, 150448610, 150318110, 150318210, 150145710, 150145810, 150302770, 150145910, 150146010, 150318410, 150318510, 150143010, 150143110, 150318610, 150318710, 150319010, 150319310, 150318810, 150319110, 150319410, 150318910, 150319210, 150319510, 150141010, 150279510, 150279610, 150141410, 150141610, 150141710, 150359470, 150143610, 150141510, 150375570, 150375670, 150375770, 150139310, 150244910, 150245010, 150359510, 150359610, 150150010, 150275910, 150359710, 150359810, 150359910, 150150110, 150264810, 150245110, 150245210, 150375870, 150375970, 150376070, 150381550, 150381650, 150381750, 150381850, 150381950, 150382050, 150144010, 150320710, 150144310, 150346610, 150144810 |
| Cardioversion | DPC EF | 140055010 |

ATC, Anatomical Therapeutic Chemical; DPC, Diagnosis Procedure Combination; ECMO, Extra Corporeal Membrane Oxygenation; ED, Emergency Department; ECG, Electrocardiogram; IABP, Intra-Aortic Balloon Pump; ICD-10, International Classification of Diseases, 10th Revision; ICU, Intensive Care Unit; NSER, NEXT Stage ER.

### Supplemental Table 3: Item, data source and code for Costs related to ICD/CRT-D shock event

| Item | Data source | Code (ICD-10 or ATC) |
| --- | --- | --- |
| Related Costs |  |  |
| Total Hospital Costs | DPC EF | － |
| ECG | DPC EF | Same as Supplemental Table 2 |
| Chest x-ray | Medical record | － |
| Cardiac catheterization | DPC EF | Same as Supplemental Table 2 |
| Echocardiography | DPC EF | Same as Supplemental Table 2 |
| Electrophysiology study and ablation | DPC EF | Same as Supplemental Table 2 |
| Stress test | DPC EF | Same as Supplemental Table 2 |
| Lead or device revision | DPC EF | Same as Supplemental Table 2 |
| Percutaneous coronary intervention | DPC EF | Same as Supplemental Table 2 |
| Circulatory support | DPC EF | Same as Supplemental Table 2 |
| Heart/pericardium operations including surgery | DPC EF | Same as Supplemental Table 2 |
| Cardioversion | DPC EF | Same as Supplemental Table 2 |

**Abbreviations**: ATC, Anatomical Therapeutic Chemical; DPC, Diagnosis Procedure Combination; ECG, Electrocardiogram; ICD-10, International Classification of Diseases, 10th Revision; NSER, NEXT Stage ER.

### Supplemental Table 4: Item, data source and code for Clinical Outcomes

| Item | Data source | Code (ICD-10 or ATC) |
| --- | --- | --- |
| Outcome |  |  |
| Length of hospital stay | DPC FF1 | － |
| Destination after hospitalization |  |  |
| Death (In-hospital mortality) | DPC FF1 | － |
| Home | DPC FF1 | － |
| Other hospital | DPC FF1 | － |
| Complications during hospitalization |  |  |
| Acute cerebral infarction | DPC FF1 | I639 |
| Acute arterial occlusion | DPC FF1 | I742, I743 |
| Deep vein thrombosis | DPC FF1 | I801, I802, I828 |
| Cholesterol embolism | DPC FF1 | I749, K868, N280 |
| Thrombosis | DPC FF1 | I200, I210, I211, I212, I213, I214, I219, I220, I221, I228, I229, I240, I241, I248, I249, I630, I631, I632, I633, I634, I635, I636, I638, I639, I740, I741, I742, I743, I744, I745, I748, I749, N280, I64, G450, G451, G453, G454, G458, G459, I260, I269, G08, I800, I801, I802, I803, I808, I809, I81, I820, I821, I822, I823, I828, I829 |
| Heart failure | DPC FF1 | I500, I501, I509 |
| Acute respiratory failure | DPC FF1 | J960 |
| Acute kidney failure | DPC FF1 | N170, N171, N172, N178, N179 |
| Requirement of RRT | DPC EF | 140036710, 140051010, 140051110, 140052570, 140052810, 140052970, 140057810, 140057910, 140058010, 140058110, 140058210, 140058310, 140058410, 140058510, 140058610, 140058970, 140059170, 140059310, 140059410, 140059510, 140060210, 140060310, 140060410, 140060510, 140060610, 140060710, 140060810, 140060910, 140061010, 140062870, 140029850 |
| Hepatic failure | DPC FF1 | K720, K721, K729 |
| Free wall rupture | DPC FF1 | I219 |
| Ventricular septal rupture | DPC FF1 | I232 |
| Acute mitral regurgitation | DPC FF1 | I051, I080, I081, I083, I088, I340 |
| Major bleeding | DPC FF1 | I600, I601, I602, I603, I604, I605, I606, I607, I608, I609, I610, I611, I613, I614, I615, I616, I618, I619, I620, I621, I629, I983, S065, S066, I850, K250, K252, K254, K256, K260, K264, K266, K270, K272, K274, K276, K280, K282, K284, K286, K290, K920, K921, S272, S368 |
| Emergency cardiovascular surgery | DPC EF/ Medical record | 150138510, 150138710, 150140610, 150448310, 150448510, 150317810, 150317910, 150448410, 150448610, 150318110, 150318210, 150145710, 150145810, 150302770, 150145910, 150146010, 150318410, 150318510, 150143010, 150143110, 150318610, 150318710, 150319010, 150319310, 150318810, 150319110, 150319410, 150318910, 150319210, 150319510, 150141010, 150279510, 150279610, 150141410, 150141610, 150141710, 150359470, 150143610, 150141510, 150375570, 150375670, 150375770, 150139310, 150244910, 150245010, 150359510, 150359610, 150150010, 150275910, 150359710, 150359810, 150359910, 150150110, 150264810, 150245110, 150245210, 150375870, 150375970, 150376070, 150381550, 150381650, 150381750, 150381850, 150381950, 150382050, 150144010, 150320710, 150144310, 150346610, 150144810 |
| Failure of transplanted organ | DPC FF1 | T860, T861, T862, T863, T864, T868, T869 |
| Others | DPC FF1 | － |

**Abbreviations**: ATC, Anatomical Therapeutic Chemical; DPC, Diagnosis Procedure Combination; ECG, Electrocardiogram; ICD-10, International Classification of Diseases, 10th Revision; NSER, NEXT Stage ER; RRT, Renal Replacement Therapy.

### Supplemental Table 5: Healthcare Cost related to ICD/CRT-D shock event by Procedures

|  | **All shock** | | **Appropriate** | | **Inappropriate** | |
| --- | --- | --- | --- | --- | --- | --- |
|  | **Number of shocks** | **Cost (JPY)** | **Number of shocks** | **Cost (JPY)** | **Number of shocks** | **Cost (JPY)** |
| Total healthcare Costs | 146 | 949,870 ± 2,013,210 | 122 | 1,123,531 ± 2,195,483 | 24 | 67,091 ± 131,282 |
| ECG | 137 | 6,995 ± 16,147 | 118 | 7,806 ± 17,338 | 19 | 1,954 ± 1,208 |
| Chest x-ray | 131 | 5,901 ± 10,750 | 114 | 6,390 ± 11,473 | 17 | 2,623 ± 1,437 |
| Cardiac catheterization | 13 | 67,271 ± 3,150 | 13 | 67,271 ± 3,016 | 0 |  |
| Echocardiography | 103 | 9,299 ± 2,143 | 96 | 9,047 ± 959 | 7 | 12,760 ± 7,920 |
| Electrophysiology study and ablation | 12 | 1,777,404 ± 814,648 | 11 | 1,784,273 ± 814,648 | 1 | 1,701,850 |
| Stress test | 3 | 20,350 ± 14,574 | 3 | 20,350 ± 10,306 | 0 | - |
| Lead or device revision | 1 | 3,215,540 ± 0 | 1 | 3,215,540 | 0 | - |
| Percutaneous coronary intervention | 0 | - | 0 | - | 0 | - |
| Circulatory support | 1 | 3,202,540 ± 0 | 1 | 3,202,540 | 0 | - |
| Heart/pericardium operations including surgery | 0 | - | 0 | - | 0 | - |
| Cardioversion | 9 | 37,976 ± 2,347 | 7 | 38,827±2,535 | 2 | 35,000±0 |

**Notes**: Cost data are presented as mean ± SD.

**Abbreviations**: ECG, Electrocardiogram.

### Supplemental Table 6: Complications during hospitalization

|  | **All Inpatient Visits**  (No. of shocks=55) | **Appropriate**  (No. of shocks=51) | **Inappropriate**  (No. of shocks=4) |
| --- | --- | --- | --- |
| Acute cerebral infarction | 0 (0.0) | 0 (0.0) | 0 (0.0) |
| Acute arterial occlusion | 1 (1.8) | 1 (2.0) | 0 (0.0) |
| Deep vein thrombosis | 2 (3.6) | 2 (3.9) | 0 (0.0) |
| Cholesterol embolism | 0 (0.0) | 0 (0.0) | 0 (0.0) |
| Thrombosis | 0 (0.0) | 0 (0.0) | 0 (0.0) |
| Acute cardiac failure | 8 (14.5) | 7 (13.7) | 1 (25.0) |
| Acute respiratory failure | 0 (0.0) | 0 (0.0) | 0 (0.0) |
| Acute kidney failure | 1 (1.8) | 1 (2.0) | 0 (0.0) |
| Requirement of RRT | 0 (0.0) | 0 (0.0) | 0 (0.0) |
| Hepatic failure | 0 (0.0) | 0 (0.0) | 0 (0.0) |
| Free wall rupture | 0 (0.0) | 0 (0.0) | 0 (0.0) |
| Ventricular septal rupture | 0 (0.0) | 0 (0.0) | 0 (0.0) |
| Acute mitral regurgitation | 0 (0.0) | 0 (0.0) | 0 (0.0) |
| Major bleeding | 0 (0.0) | 0 (0.0) | 0 (0.0) |
| Emergency cardiovascular surgery | 1 (1.8) | 1 (2.0) | 0 (0.0) |
| Failure of transplanted organ | 0 (0.0) | 0 (0.0) | 0 (0.0) |
| Others (COVID-19, Bacteremia, etc.) | 5 (9.1) | 4 (7.8) | 1 (25.0) |

**Notes**: Categorical data are presented as n (%).

**Abbreviations**: COVID, coronavirus disease; RRT, renal replacement therapy.
